# Supplementary material for: Single-cell analysis reveals transcriptomic features and therapeutic targets in primary pulmonary lymphoepithelioma-like carcinoma
Source: Springer Nature journal article supplement (doi:10.1038/s42003-025-07819-0), 2025-03-08
Supplement: MOESM1 [file 42003_2025_7819_MOESM1_ESM.pdf]

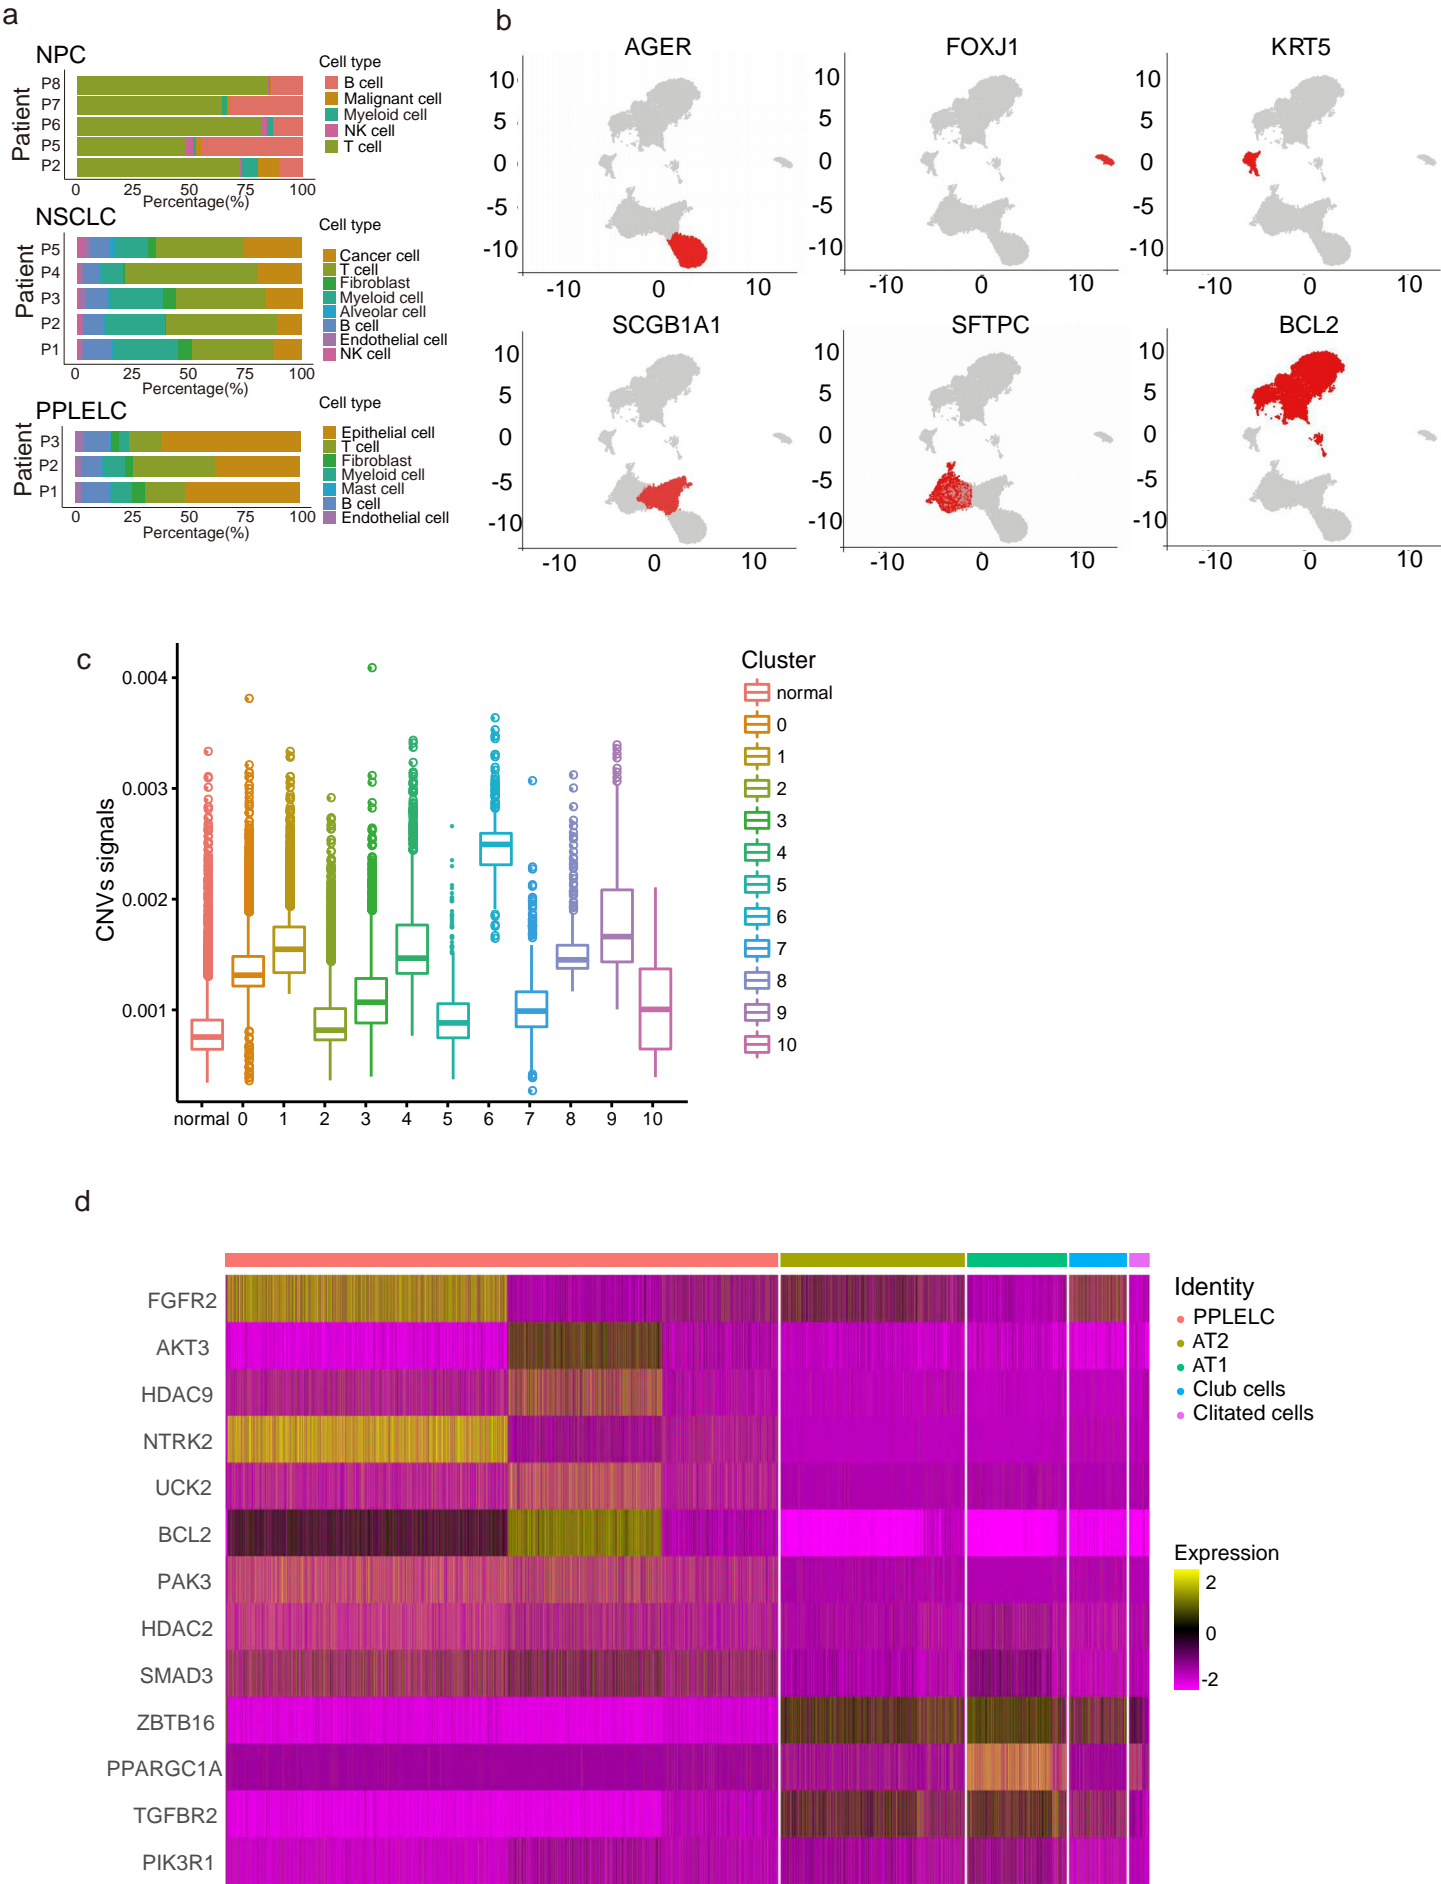

**Supplementary Figure 1. Additional information of epithelial cell subsets in PPLELC.** a, different cell type fractions in NPC, NSCLC and PPLELC. b, Expression and distribution of canonical T cell marker genes among cellsc, CNV signals of every epithelial subset in PPLELC. d, Heatmap of expression of every epithelial subset in PPLELC.

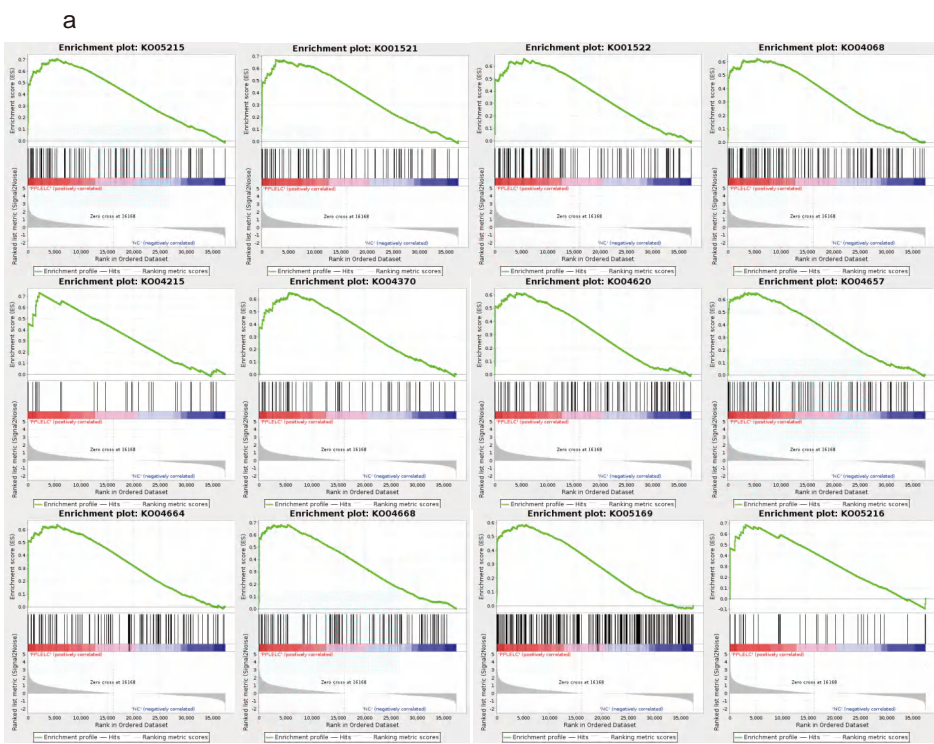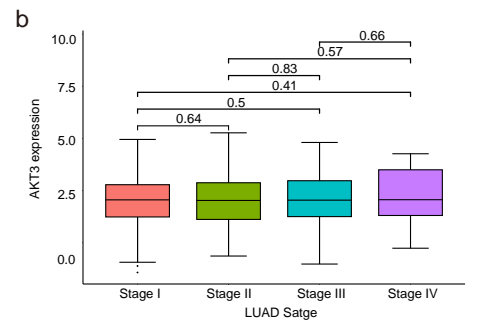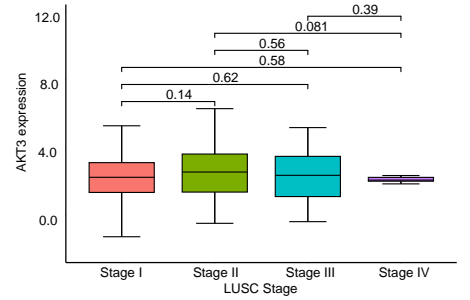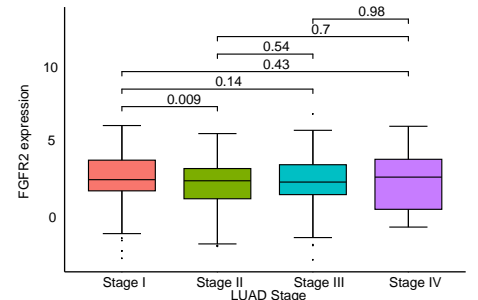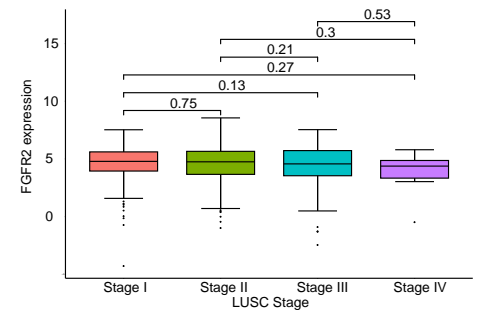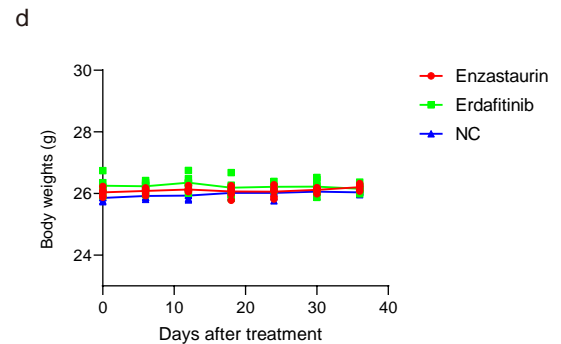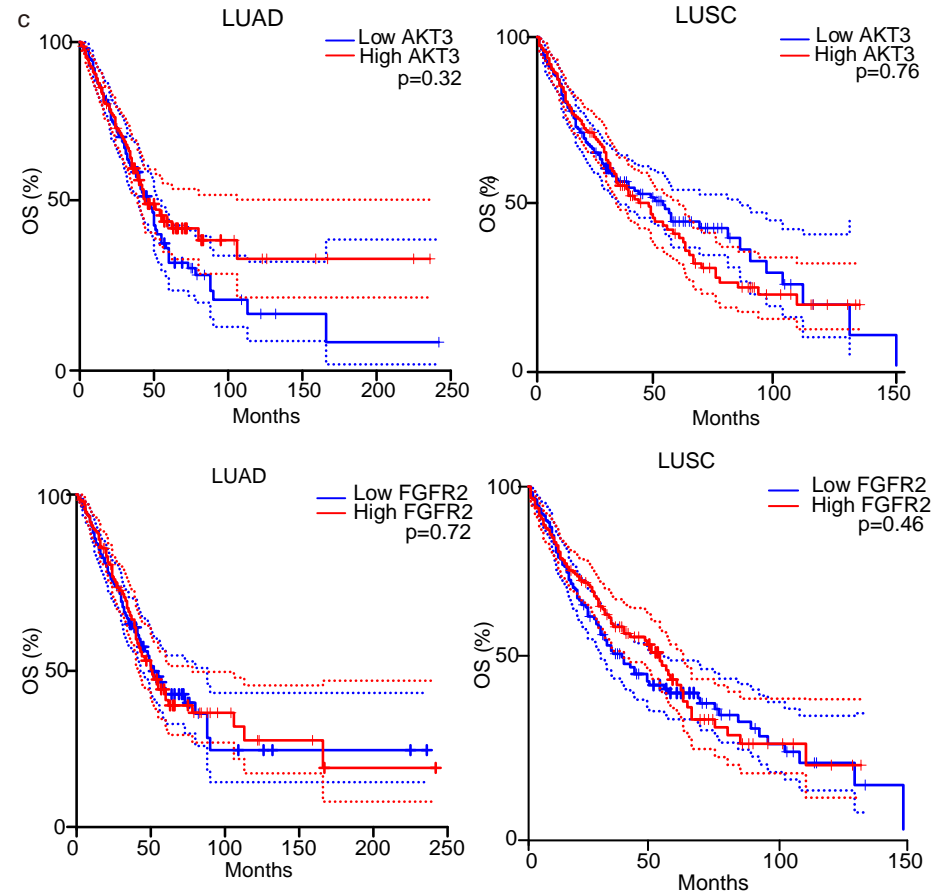

**Supplementary Figure 2. Additional information of PPLELC 6.** a, Enriched pathway of DEGs in PPLELC 6 by GSEA. b, Box plot showed the relationships between AKT3 or FGFR2 and clinical stages of LUAD and LUSC. c, Overall survival of LUAD (n=478) and LUSC patients(n=484) with high or low expression of AKT3 or FGFR2 with the medium expression as the threshold. P-values are shown in figures. d, Body weights curves of PDXs(n=6 per group, unit:mg).

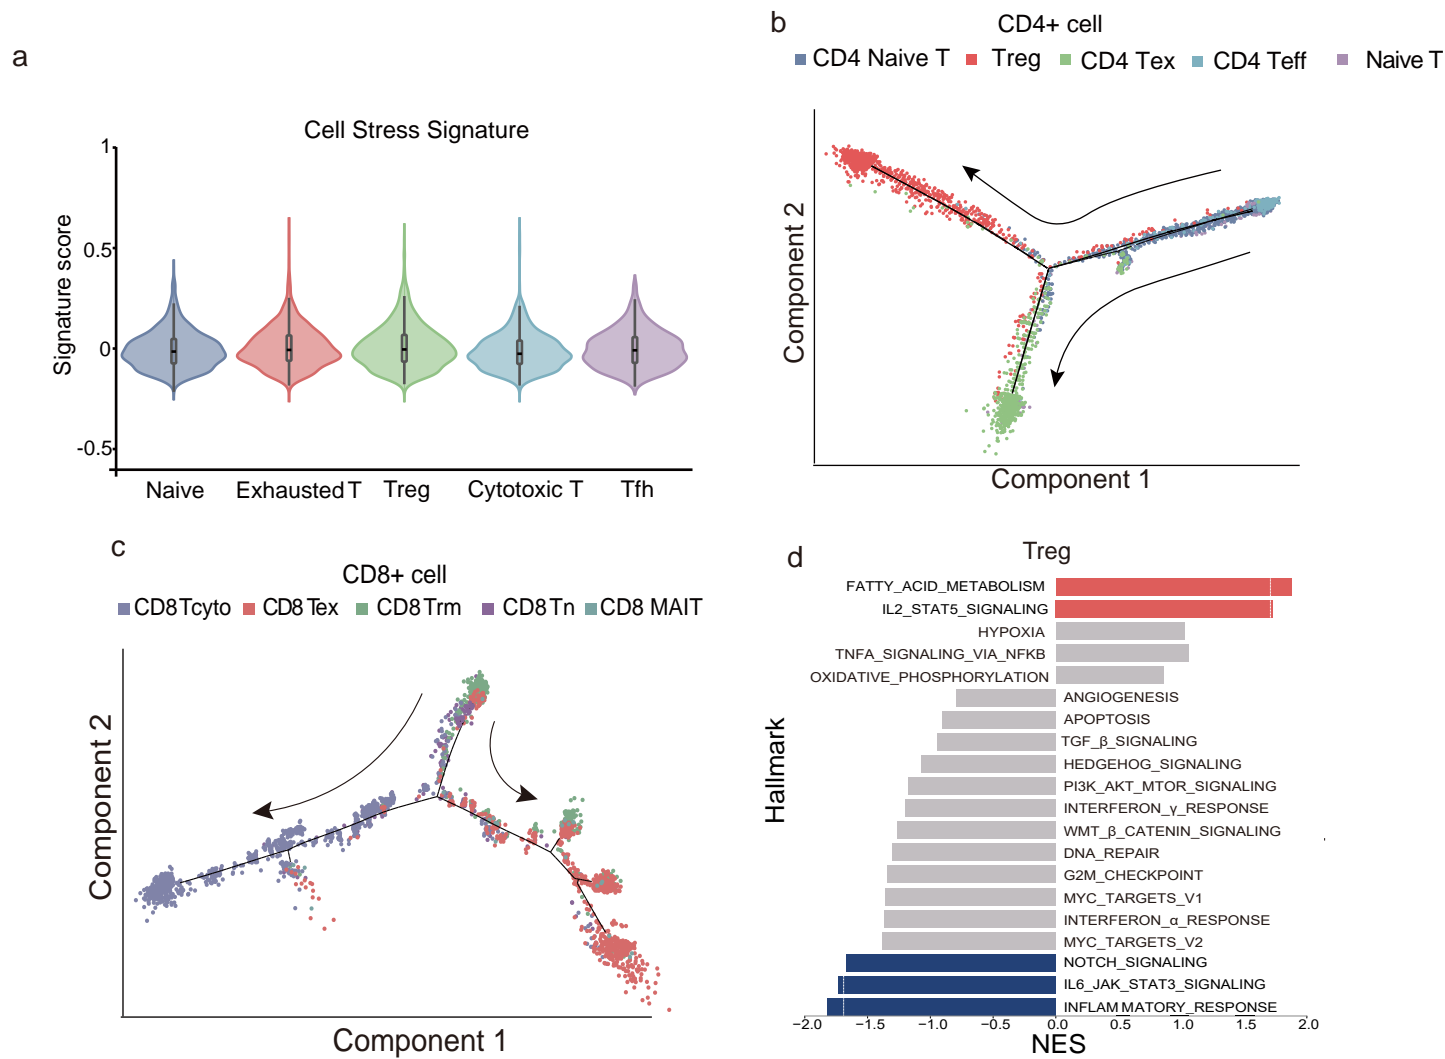

**Supplementary Figure 3. Additional information of tumor-infiltrating T cells in PPLELC.** a, Violin plots showing the signature scores of cell stress gene sets for each tumor-infiltrating T cell cluster. b, The developmental trajectory of CD4+ T cells inferred by Monocle2. c, The developmental trajectory of CD8+T cells inferred by Monocle2. d, GSEA of significantly enriched pathways for DEGs of Treg.

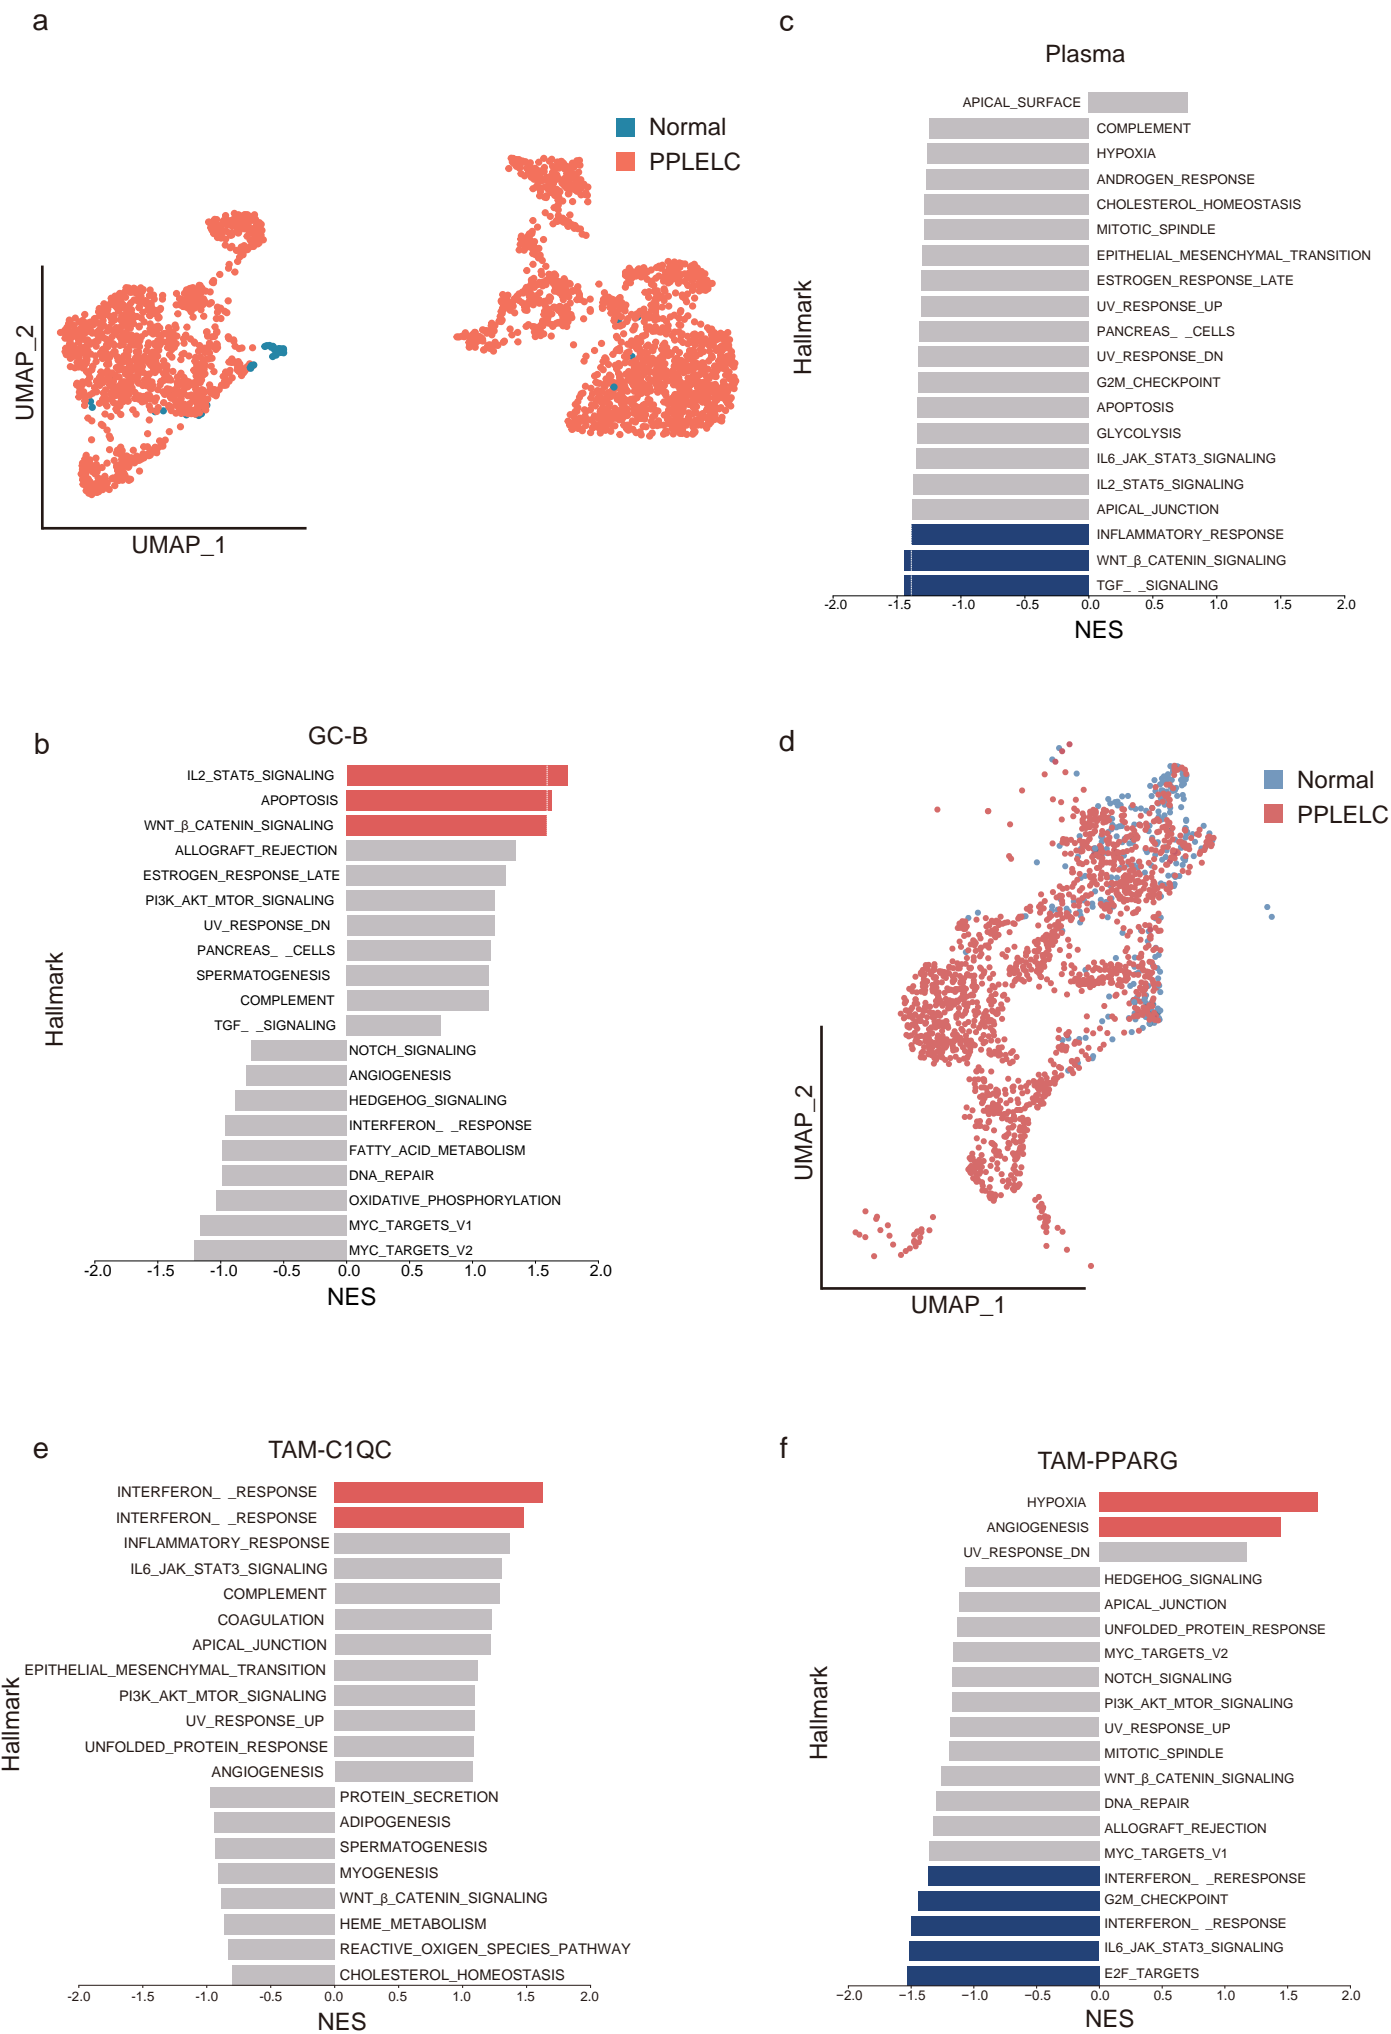

**Supplementary Figure 4. Additional information of B cells and macrophages in PPLELC.** a, B cell distribution from tumors and nonmalignant tissues. b, GSEA of significantly enriched pathways for DEGs of GC-B. c, GSEA of significantly enriched pathways for DEGs of plasma. d, Macrophage distribution from tumors and nonmalignant tissues. e, GSEA of significantly enriched pathways for DEGs of TAM-C1QC. f, GSEA of significantly enriched pathways for DEGs of TAM-PPARG.

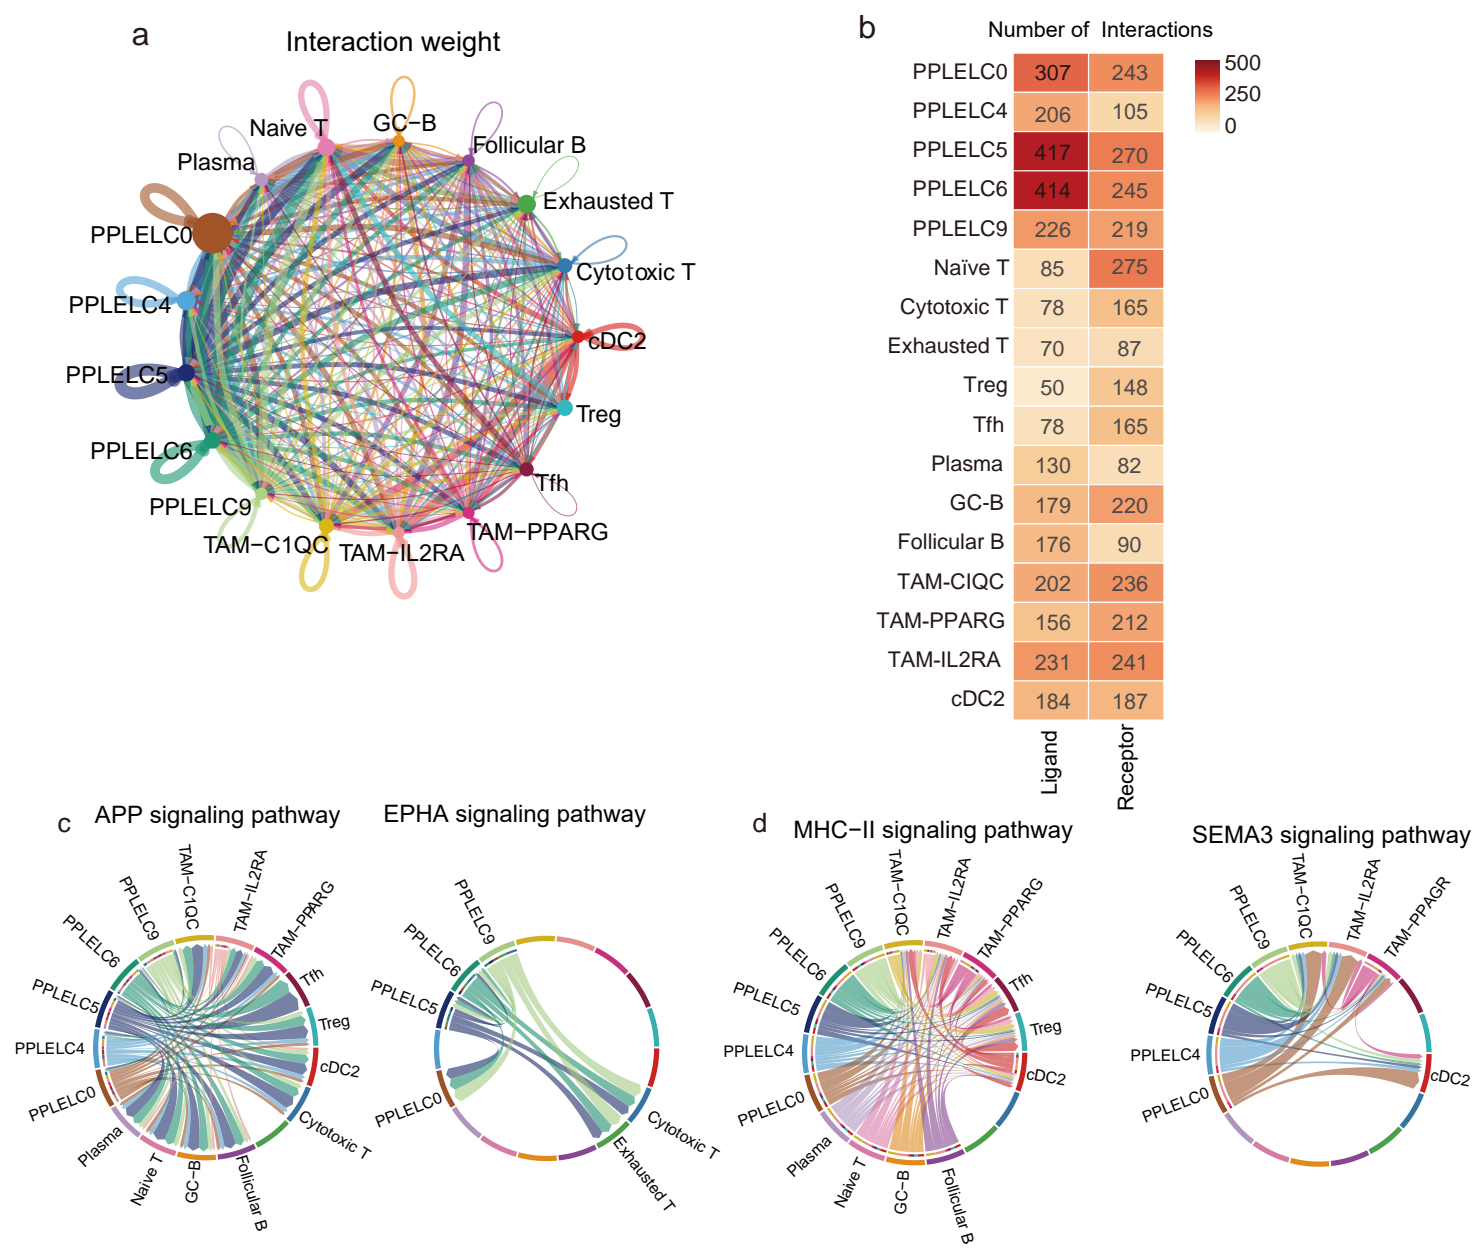

**Supplementary Figure 5. Additional information of cell interactions in PPLELC.** a, Circo plots of the weights of interaction between cell types in the snRNA-seq data. b, the details of the number of interaction between cell types. c, d, Chord plots displaying the pathways enriched in the putative ligand-receptor interactions between malignant cell clusters and other cell types.



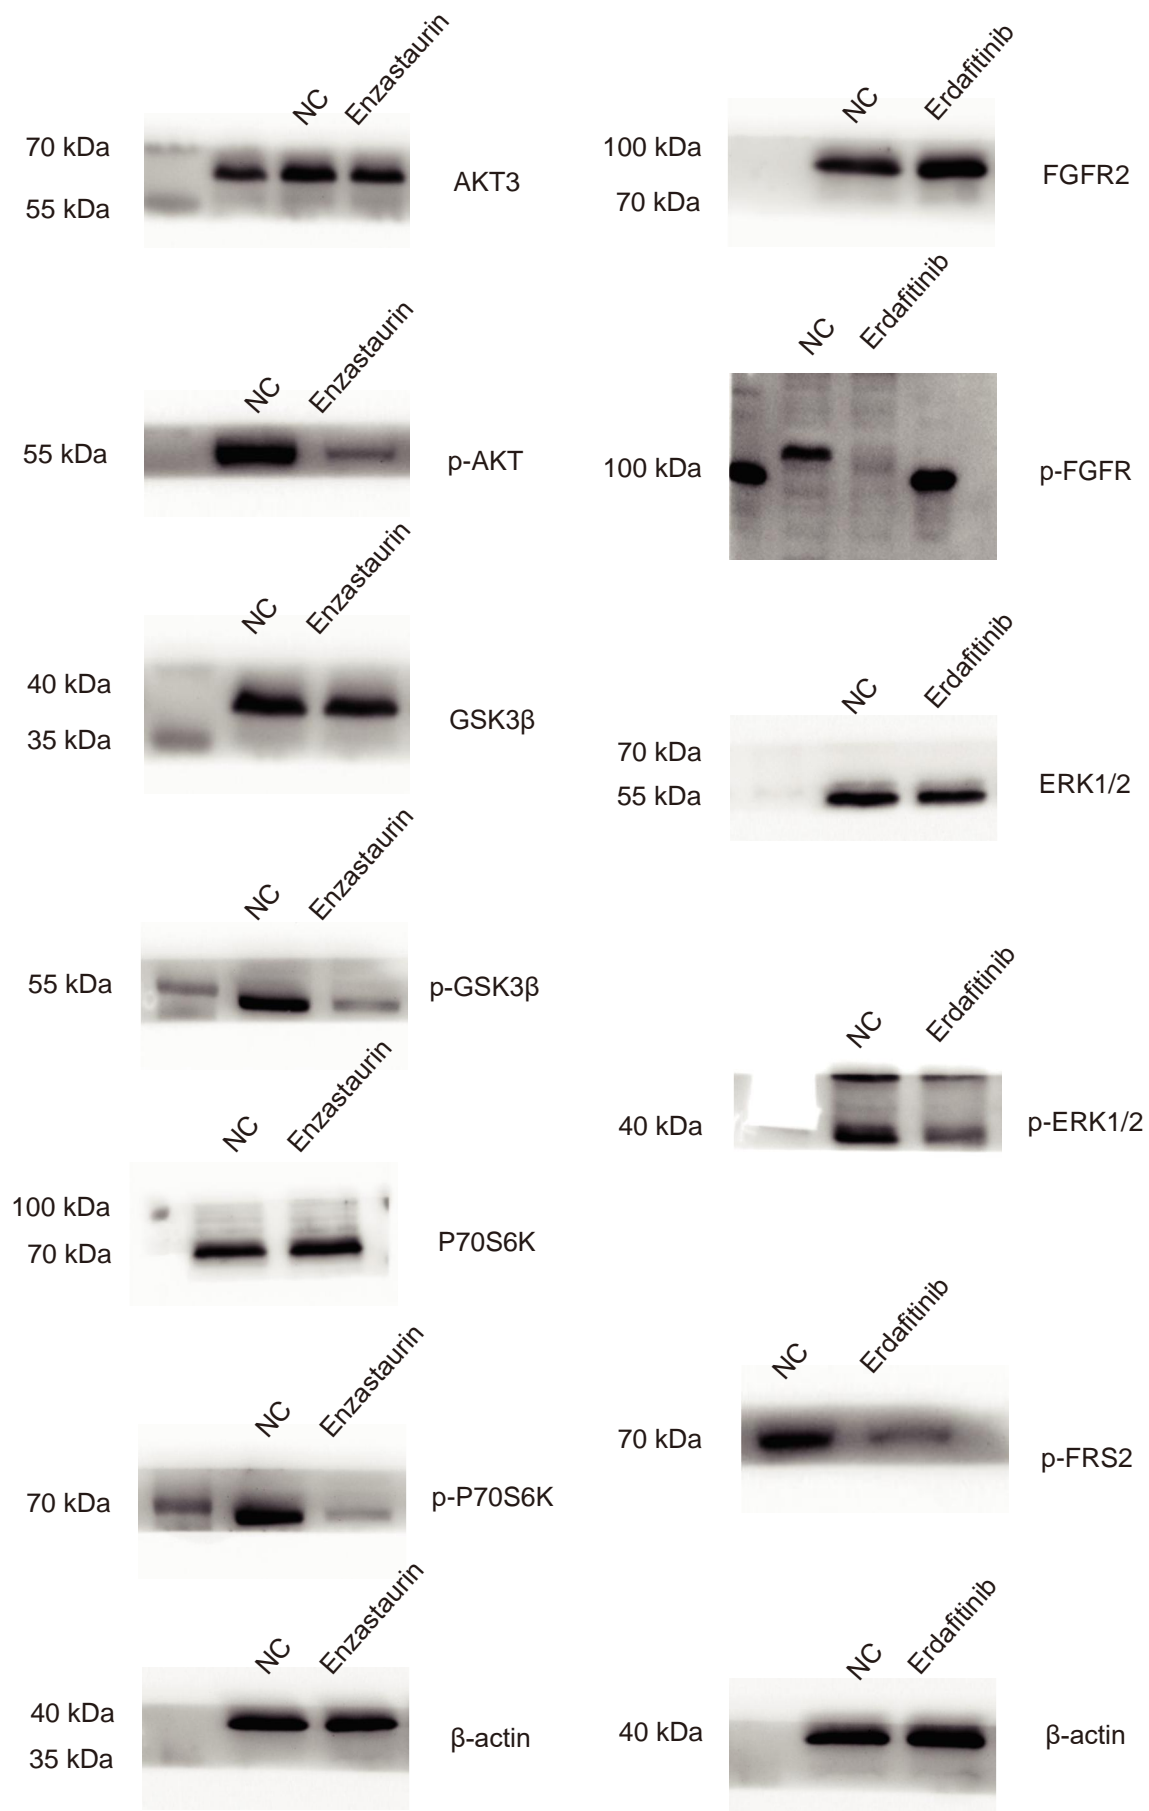

Supplementary Figure 6. Unprocessed scans of western blots presented in Figure 3g.
